# Supplementary material
Source: publisher figshare collection journal article supplement (https://acs.figshare.com/ndownloader/files/24510908)
Supplement: Supplementary file 1 [file 24510908]

**Supporting Information**

**Semi-Interpenetrating Polymer Network of Hyaluronan and  
Chitosan Self-Healing Hydrogels for Central Nervous System Repair**

Yi Liu<sup>1</sup>, Yi-Hua Hsu<sup>2</sup>, Abel Po-Hao Huang<sup>1,2</sup>, and Shan-hui Hsu<sup>1,3,\*</sup>

<sup>1</sup> Institute of Polymer Science and Engineering, National Taiwan University, Taipei,

Taiwan

<sup>2</sup> Department of Surgery, National Taiwan University Hospital and College of

Medicine, Taipei, Taiwan

<sup>3</sup> Institute of Cellular and System Medicine, National Health Research Institutes,

Miaoli, Taiwan

**Supplemental data: total 17**

**Tables: 2 (Table S1 – S2)**

**Figures: 8 (Figure S1 – S8)**

**Movies: 7 (Movie S1 – S7)**

\* Shan-hui Hsu (Corresponding author)

Institute of Polymer Science and Engineering, National Taiwan University, No. 1,

Sec. 4 Roosevelt Road, Taipei 10617, Taiwan, R.O.C.; E-mail: shhsu@ntu.edu.tw

1 **Table S1.** The primer sequences used for real-time RT-PCR analysis in the in vitro  
2 experiment.

| Gene   | Primer               |                         |
|--------|----------------------|-------------------------|
|        | Forward              | Reverse                 |
| GAPDH  | GGCTACAGCAACAGGGTGGT | CGAGTTGGGATAGGGCCTCT    |
| Nestin | ACTGTGGAATCACCAGGAGG | ATTCCACCTCTCCCAGAGAC    |
| Tubb3  | CAGGGCCAAGACAAGCAGCA | GGAGCCCTAATGAGCTGGTGA   |
| MAP2   | TTCTCCACTGTGGCTGTTTG | GAGCCTGTTTGTAGACTGGAAGA |
| GFAP   | CTGAACCCTCTGAGCAAATG | GAATCAAACACAGAGCCTGC    |
| CNPase | ACCCTGAGCTGGCAAGAGTA | GGTAGGAGCATACATCCCAG    |

3

- 1 **Table S2.** The primer sequences used for real-time RT-PCR analysis in the in vivo  
2 experiment.

| Gene         | Primer                 |                       |
|--------------|------------------------|-----------------------|
|              | Forward                | Reverse               |
| CCL2         | GGTCTCTGTCACGCTTCTG    | TTCTCCAGCCGACTCATTG   |
| TLR2         | GGATCTTGATGGCTGTGATAGG | CTTTGTGTTTGCTGTGAGTCC |
| IL-1 $\beta$ | CCTCAAGGGGAAGAATCTAT   | GAGGTGCTGATGTACCAGTT  |
| Arg1         | ATATCTGCCAAGGACATCGTG  | AGGTCTCTTCCATCACTTTGC |
| Caspase3     | AATTCAAGGGACGGGTCATG   | GCTTGTGCGCGTACAGTTTC  |

3

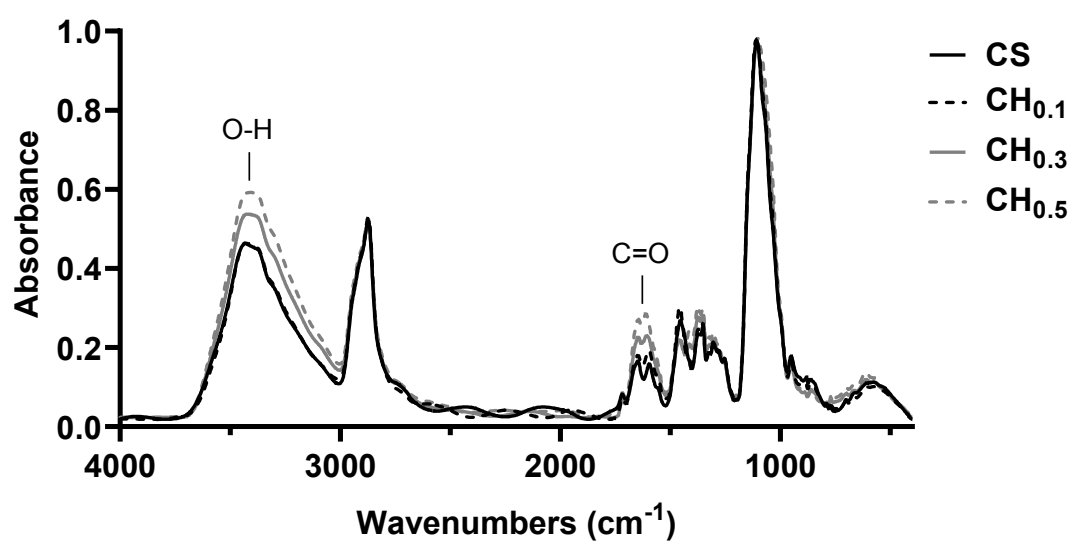

1

2 **Figure S1.** FTIR spectra of the hydrogels.

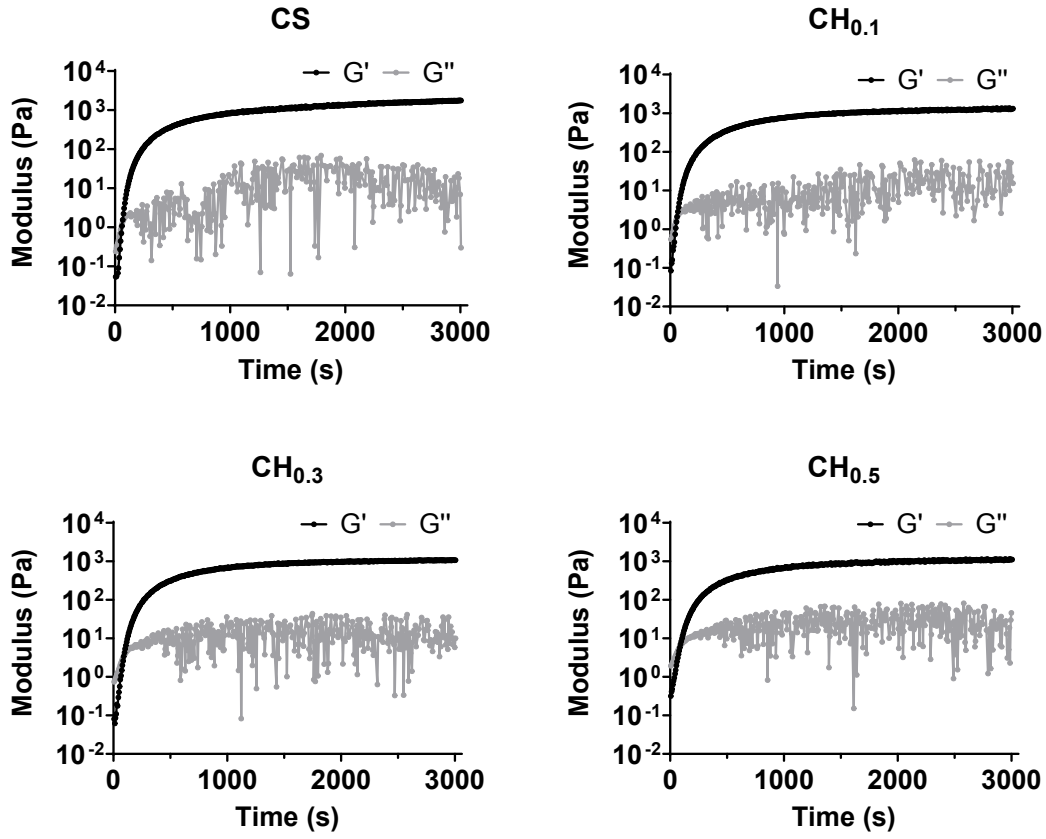

1

2 **Figure S2.** Time-sweep experiments for a longer duration of 3000 s showing the time-  
3 dependent change of storage moduli ( $G'$ ) and loss moduli ( $G''$ ) of the hydrogels at 1  
4 Hz frequency and 1% dynamic strain.  $G'$  was quite stable after 1000 s, while  $G''$  kept  
5 oscillating.

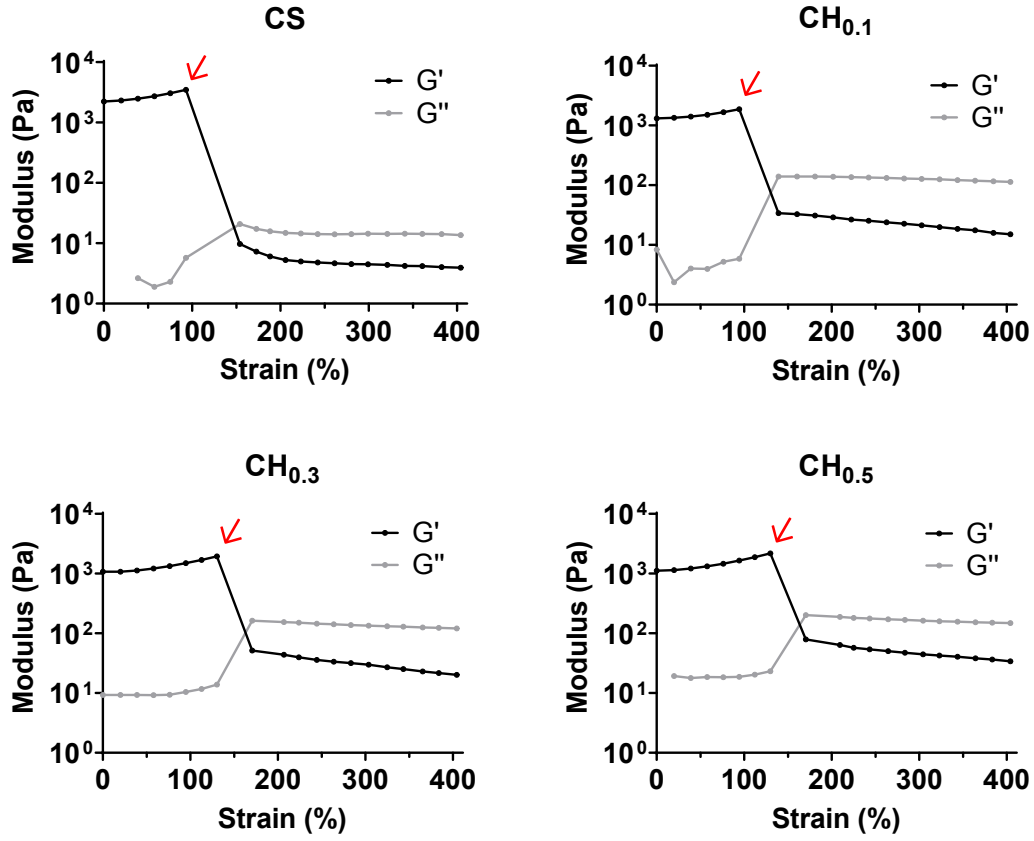

1

2 **Figure S3.** The strain-sweep experiments for the hydrogels in the range of 0.1% to 400%  
3 dynamic strain amplitudes at 1 Hz frequency. Strain hardening ( $G'$  increase with the  
4 increased strain, indicated by arrows) was observed before the structural damage (gel-  
5 to-sol transition) occurred.

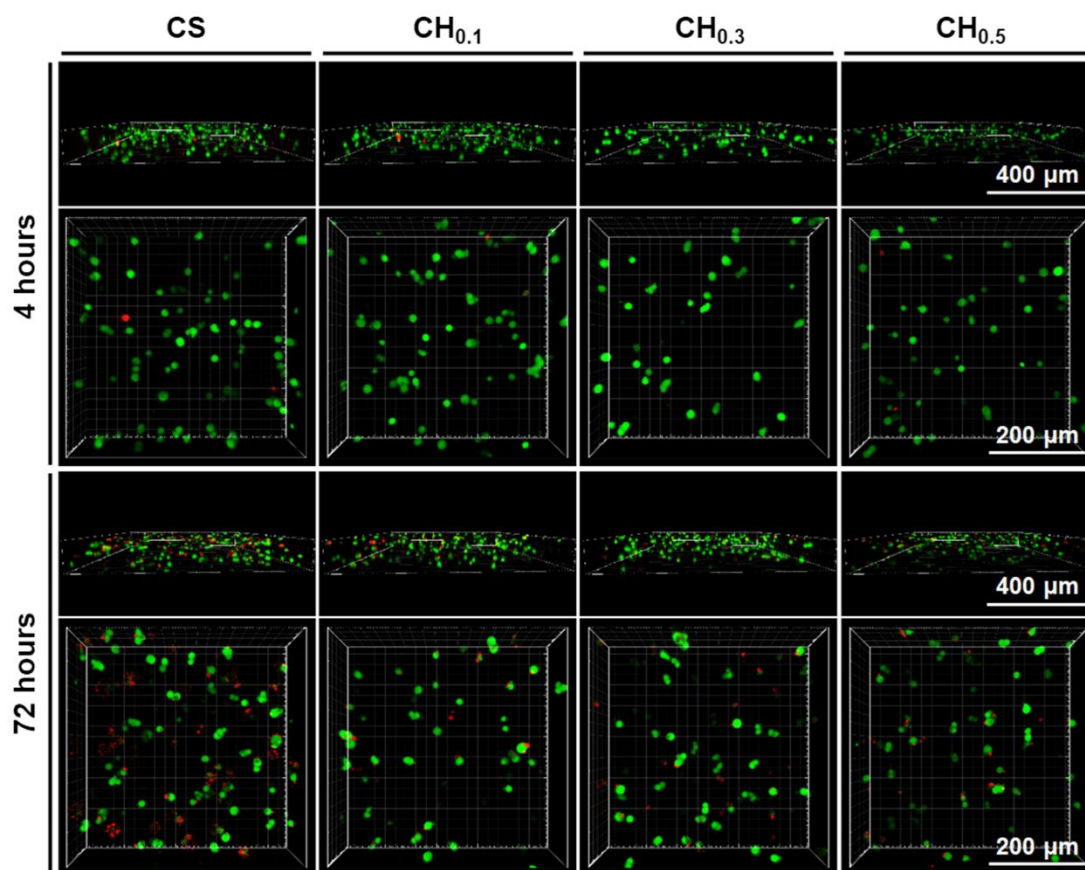

1  
2 **Figure S4.** The side views and the enlarged top views of 3D confocal microscopic  
3 images for the live/dead staining of NSCs encapsulated in CS or CH hydrogel. The  
4 apoptosis bodies of NSCs were clearly observed after 72 hours of culture in CS  
5 hydrogel. Live cells: green, dead cells: red.

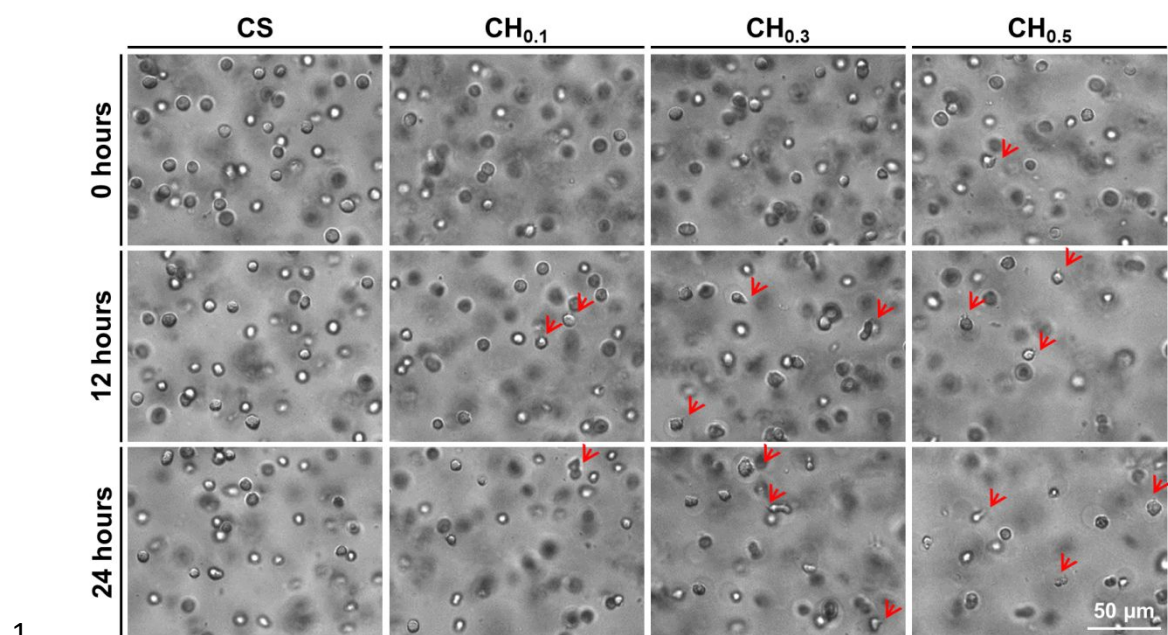

1  
2 **Figure S5.** Morphology of NSCs encapsulated in CS or CH hydrogels. Bright-field  
3 microphotographs of NSCs obtained from live-cell time-lapse imaging videos after 0,  
4 12, and 24 hours of encapsulation in the hydrogels. Filopodia or lamellipodia are  
5 indicated by arrows (↑).



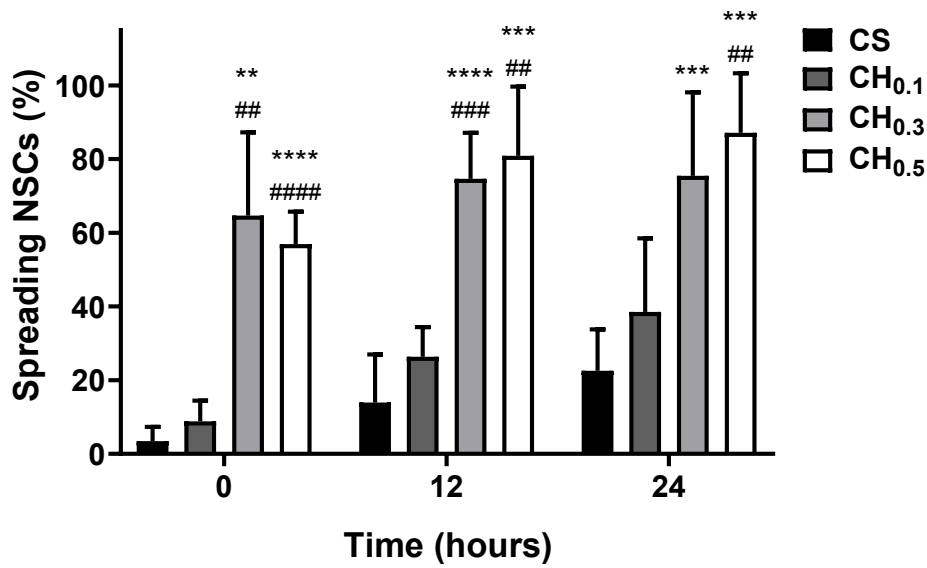

1

2 **Figure S6.** The percentage of spreading NSCs (non-circular cells) in the total  
3 population of NSCs encapsulated in CS and CH hydrogels. These data were quantified  
4 from the live-cell images at the specified time points. Two-way ANOVA was applied  
5 for comparison. \*\*, \*\*\*, and \*\*\*\* represent  $p < 0.01$ ,  $p < 0.001$ , and  $p < 0.0001$   
6 compared to the CS hydrogel group, and ##, ###, and #### represent  $p < 0.01$ ,  $p <$   
7  $0.001$ , and  $p < 0.0001$  compared to the CH<sub>0.1</sub> hydrogel group (n = 6).

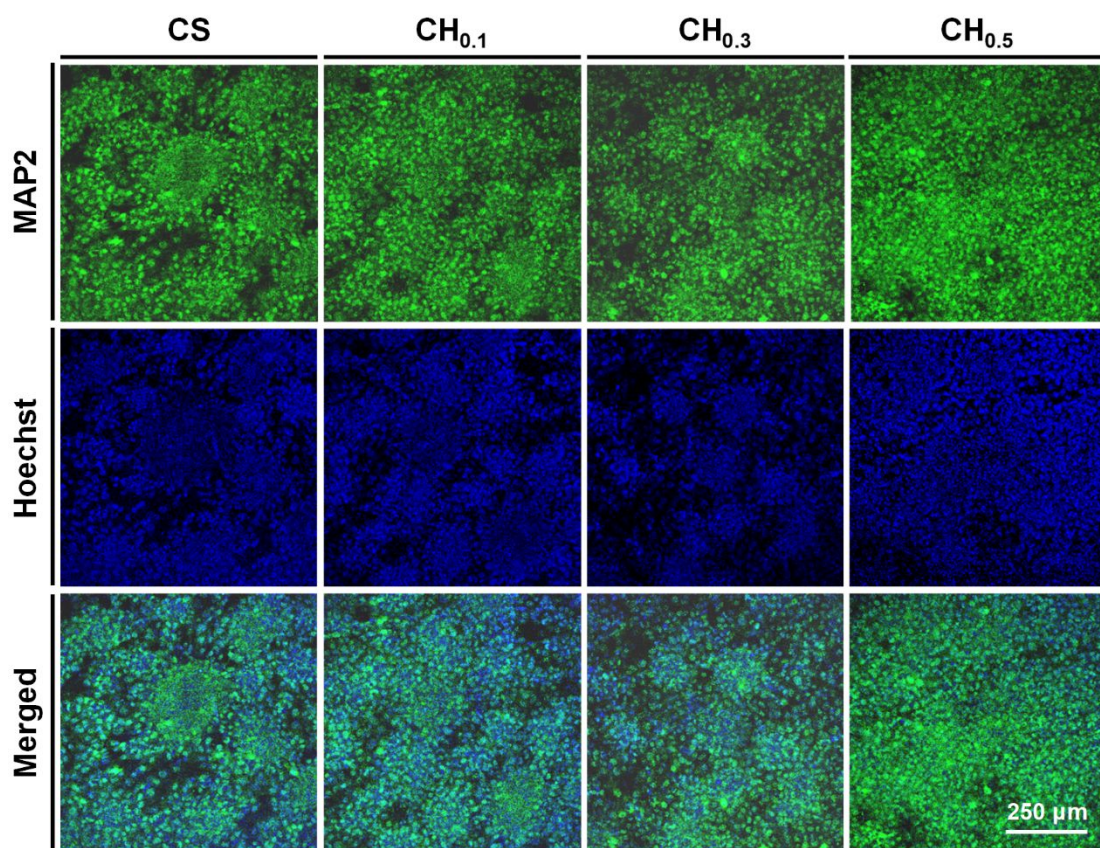

1  
2 **Figure S7.** The expression of MAP2 in NSCs analyzed by immunofluorescence  
3 staining after 7 days of encapsulation in CS and CH hydrogels. The expression of  
4 MAP2 was upregulated slightly as the HA content of the hydrogels increased. MAP2:  
5 green, Hoechst: blue.

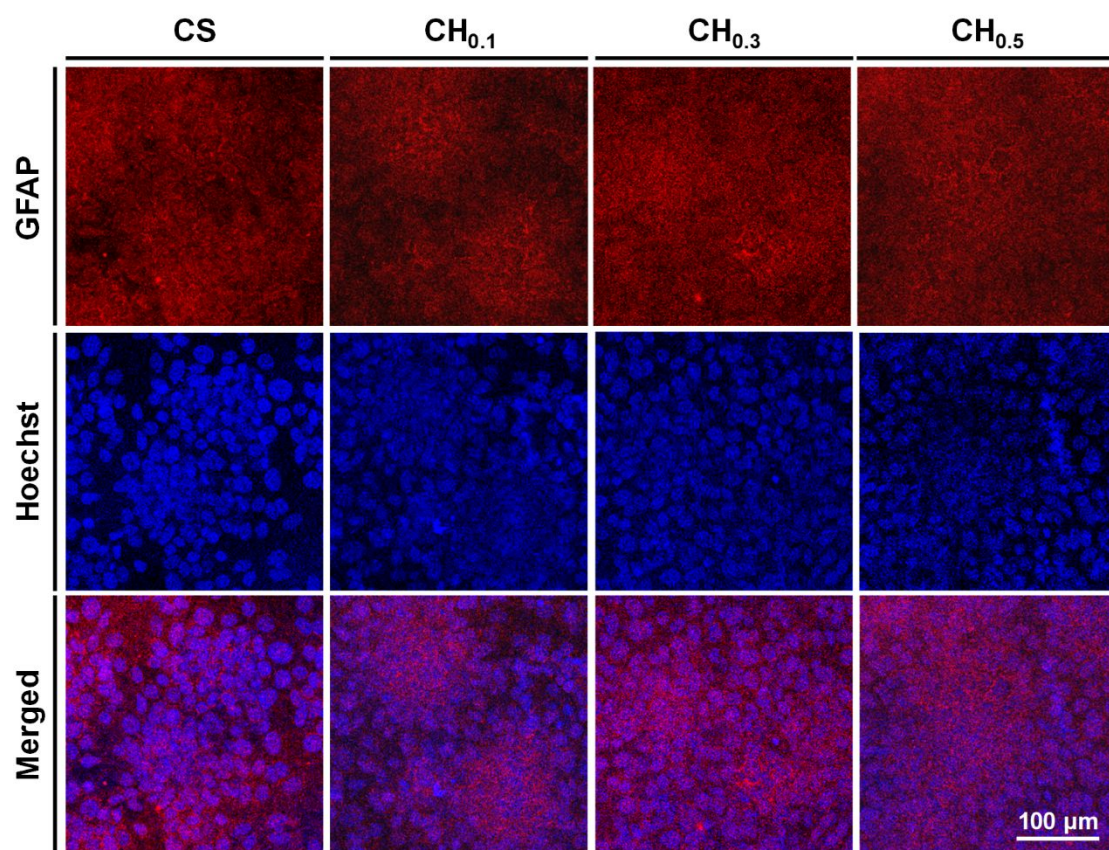

1  
2 **Figure S8.** The expression of GFAP in NSCs analyzed by immunofluorescence  
3 staining after 7 days of encapsulation in CS and CH hydrogels. The expression of GFAP  
4 revealed no significant difference among the hydrogels. GFAP: red, Hoechst: blue.

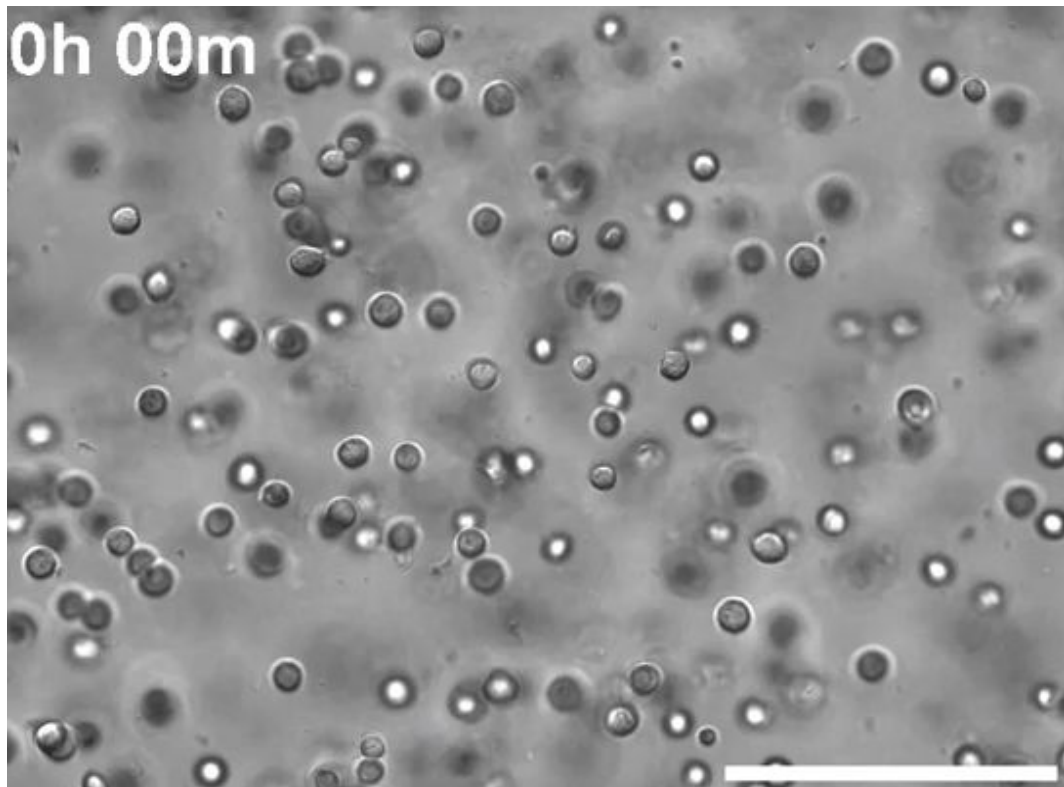

- 1
- 2 **Movie S1.** The live-cell time-lapse video of NSCs encapsulated in CS hydrogel during
- 3 24 hours of culture. Scale bar: 100  $\mu\text{m}$ .

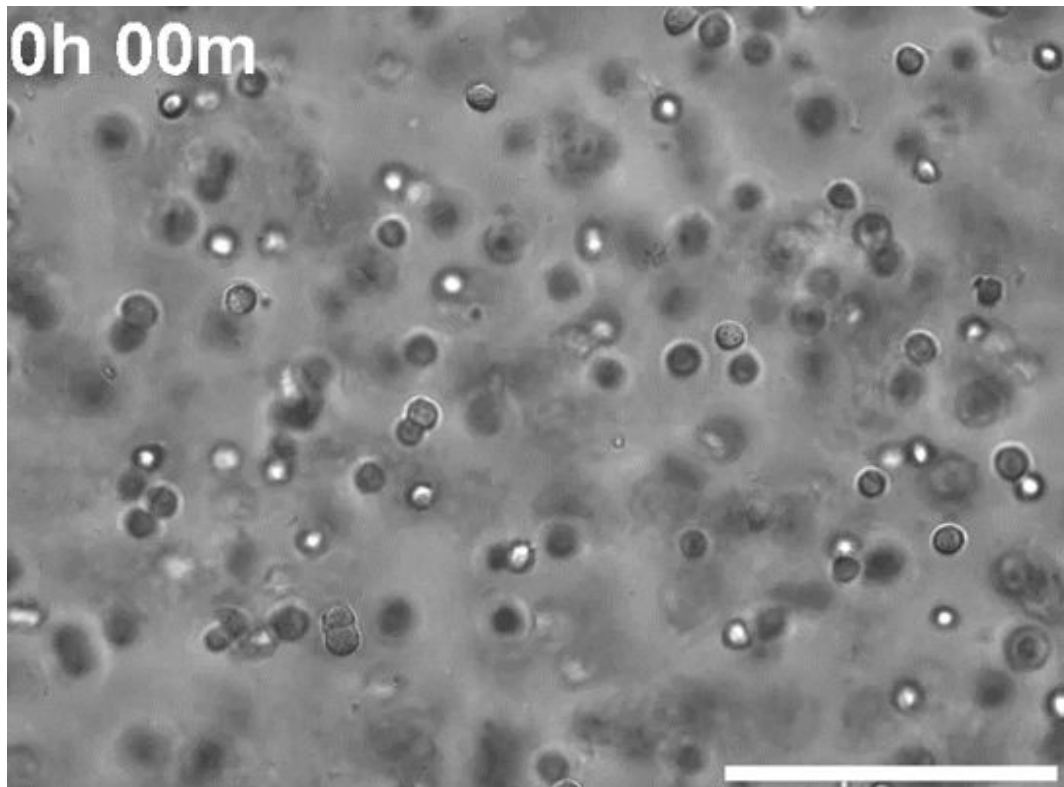

1

2 **Movie S2.** The live-cell time-lapse video of NSCs encapsulated in CH<sub>0.1</sub> hydrogel

3 during 24 hours of culture. Scale bar: 100  $\mu$ m.



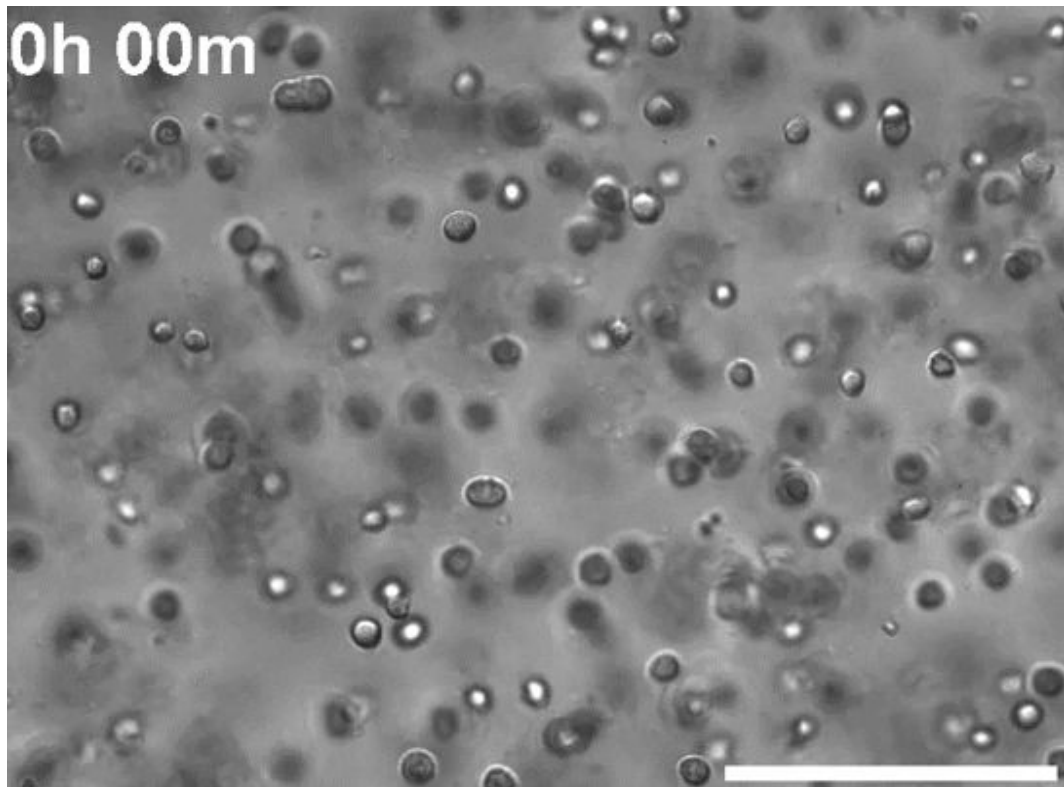

- 1
- 2 **Movie S3.** The live-cell time-lapse video of NSCs encapsulated in CH<sub>0.3</sub> hydrogel
- 3 during 24 hours of culture. Scale bar: 100  $\mu$ m.

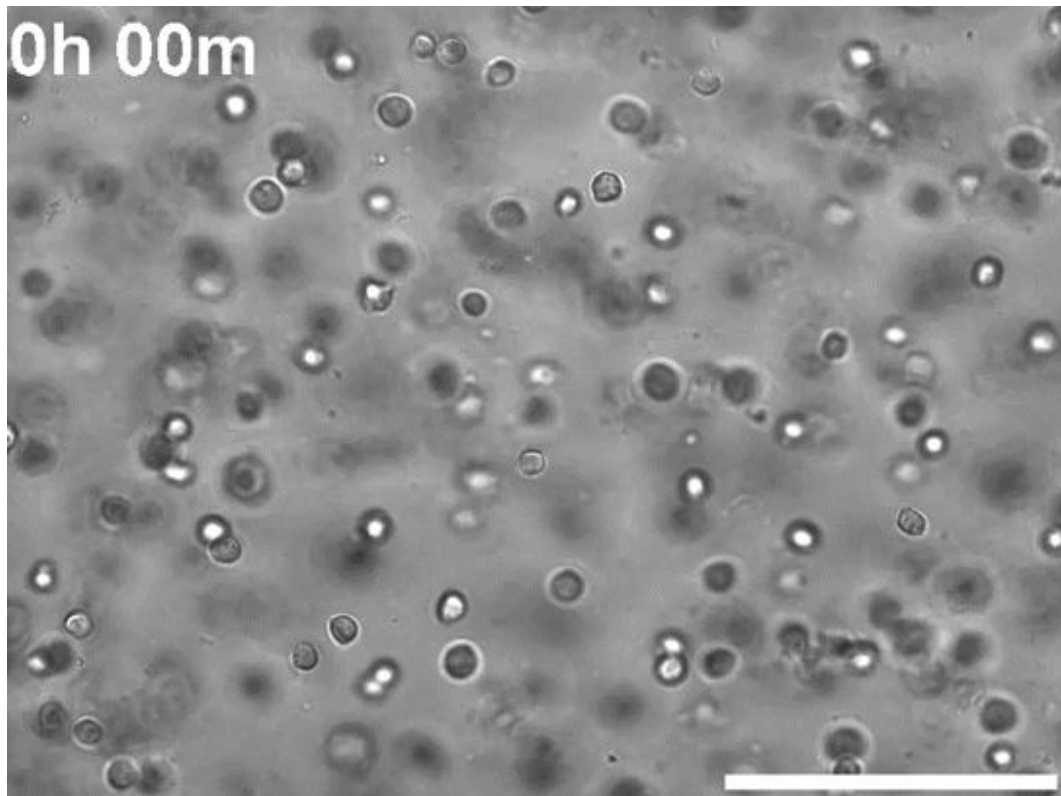

- 1
- 2 **Movie S4.** The live-cell time-lapse video of NSCs encapsulated in CH<sub>0.5</sub> hydrogel
- 3 during 24 hours of culture. Scale bar: 100  $\mu$ m.

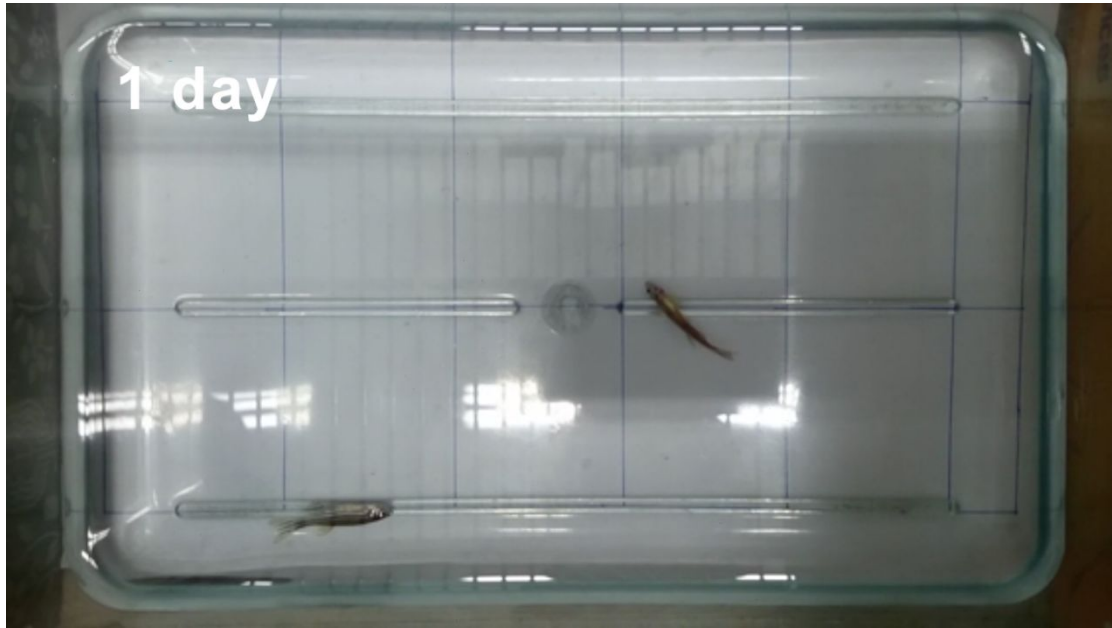

- 1
- 2 **Moive S5.** The swimming behavior of adult zebrafish with traumatic brain injury (TBI)
- 3 after the treatment of PBS.



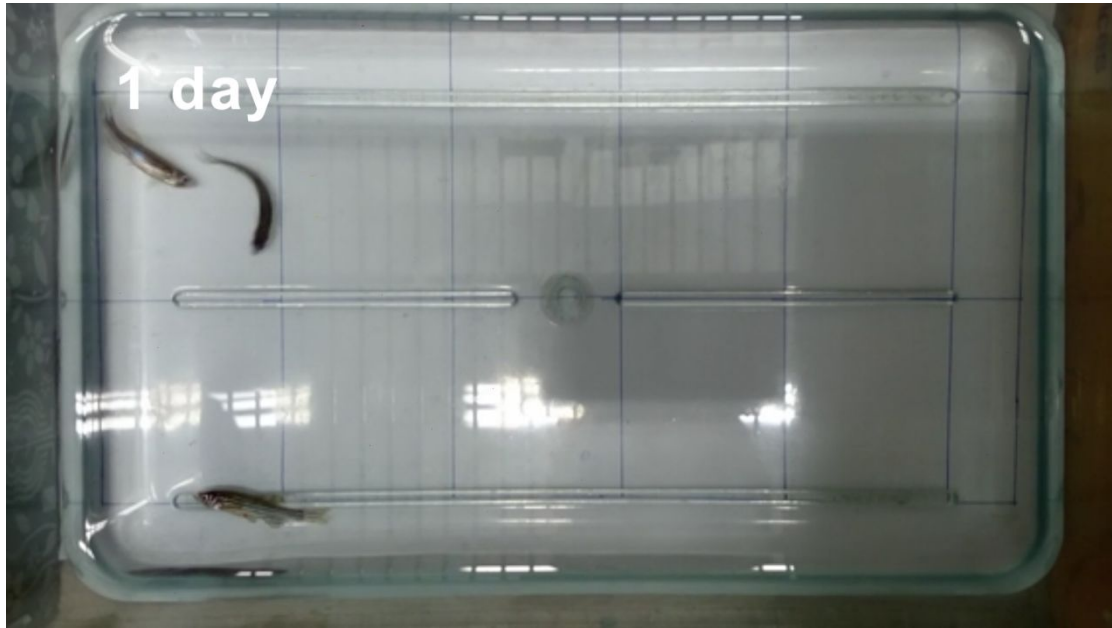

- 1
- 2 **Movie S6.** The swimming behavior of adult zebrafish with traumatic brain injury (TBI)
- 3 after the treatment of CS hydrogel.

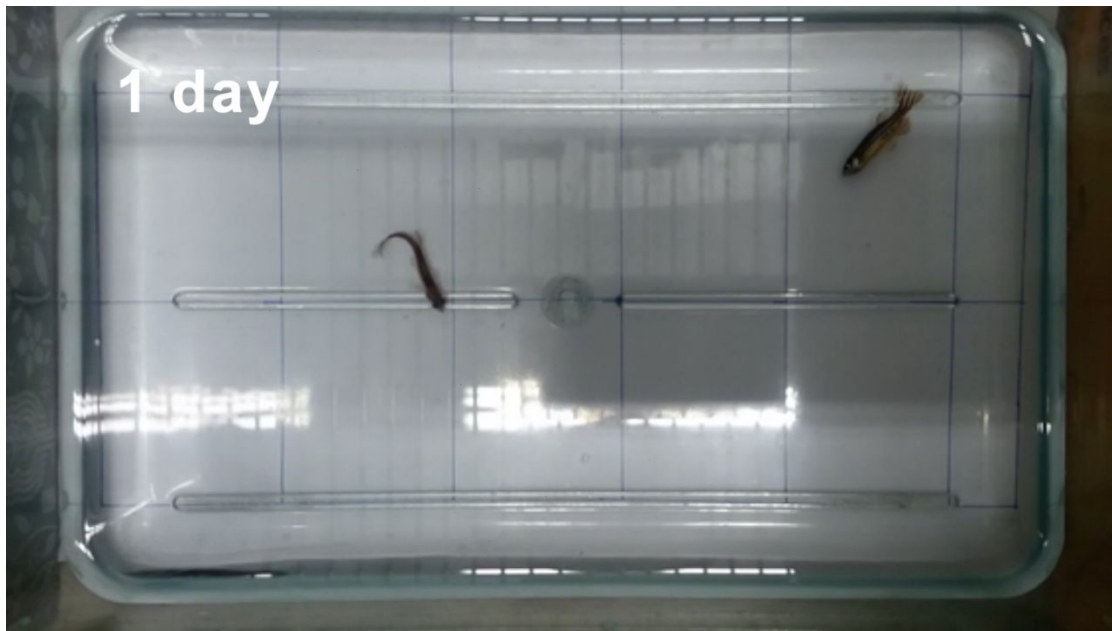

- 1
- 2 **Movie S7.** The swimming behavior of adult zebrafish with traumatic brain injury (TBI)
- 3 after the treatment of CH hydrogel.
